# Supplementary material for: Untargeted Headspace-Gas Chromatography-Ion Mobility Spectrometry in Combination with Chemometrics for Detecting the Age of Chinese Liquor (Baijiu)
Source: MDPI journal article supplement (doi:10.3390/foods10112888), 2021-11-22
Supplement: s1 [file s1]

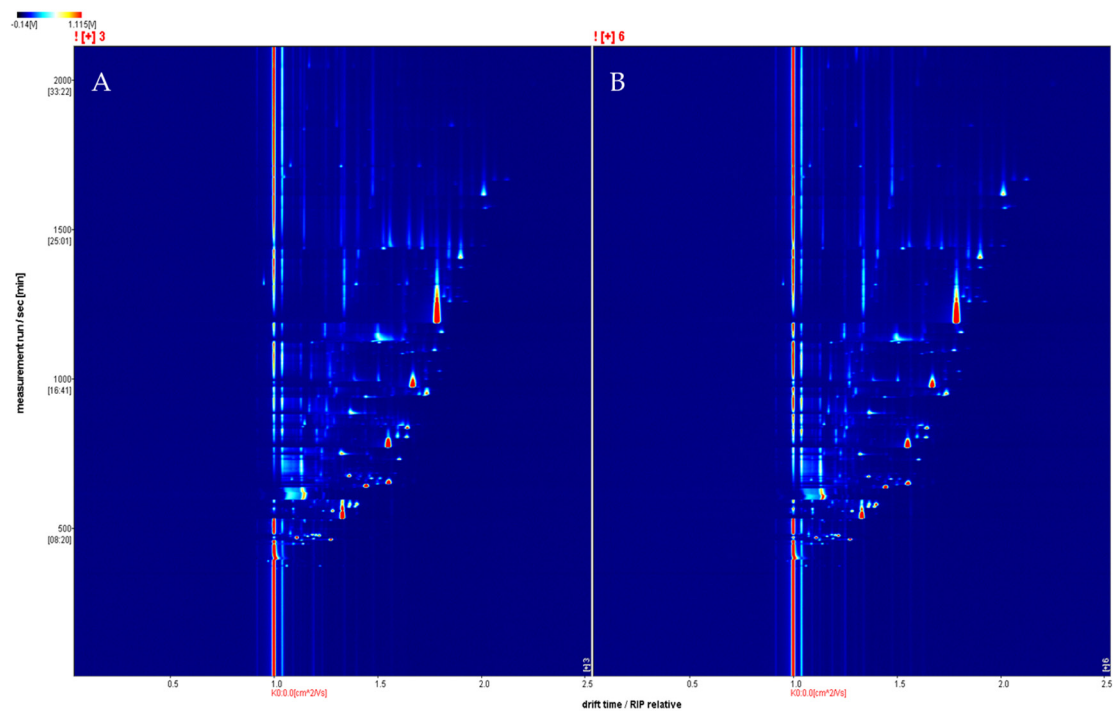

Figure S1. Topographic plot of Baijiu samples diluted with saturated brine (A), ultrapure water (B) detected by GC-IMS.

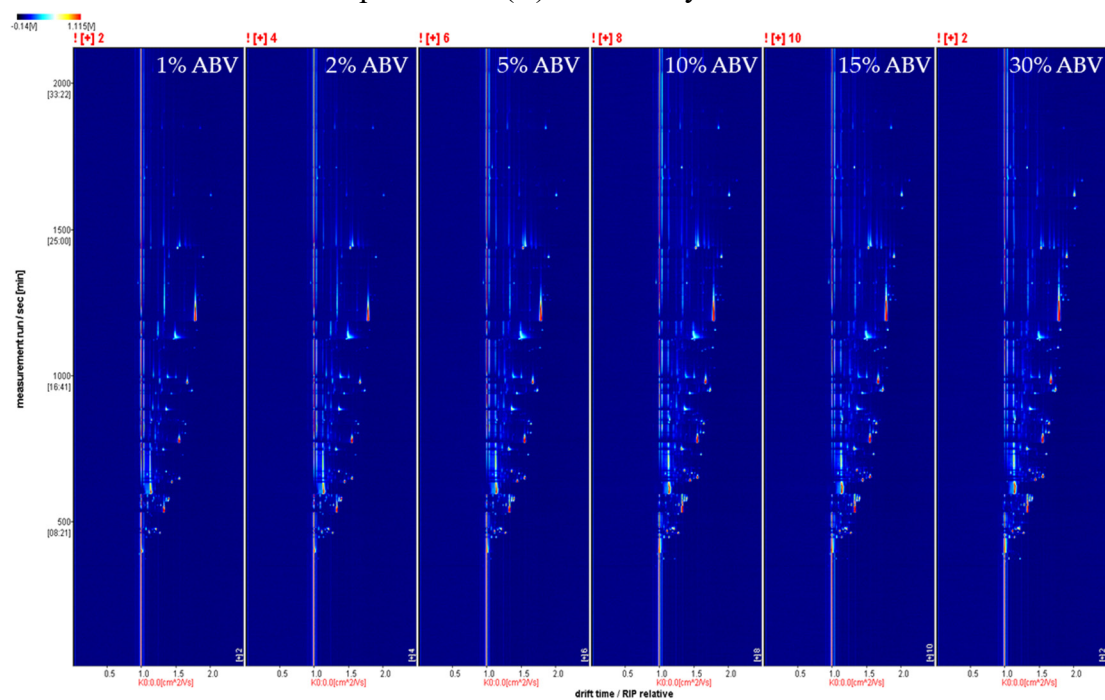

Figure S2. Topographic plot of Baijiu samples diluted in different alcohol content detected by GC-IMS.

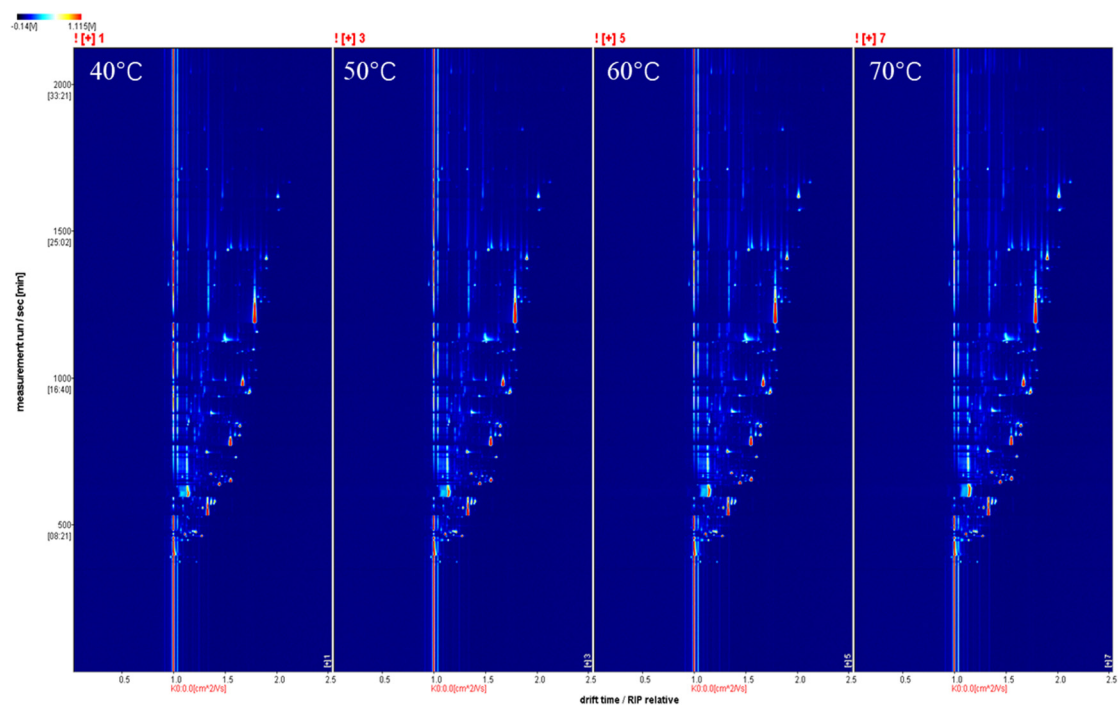

Figure S3. Topographic plot of Baijiu samples detected by GC-IMS in different incubation temperature.

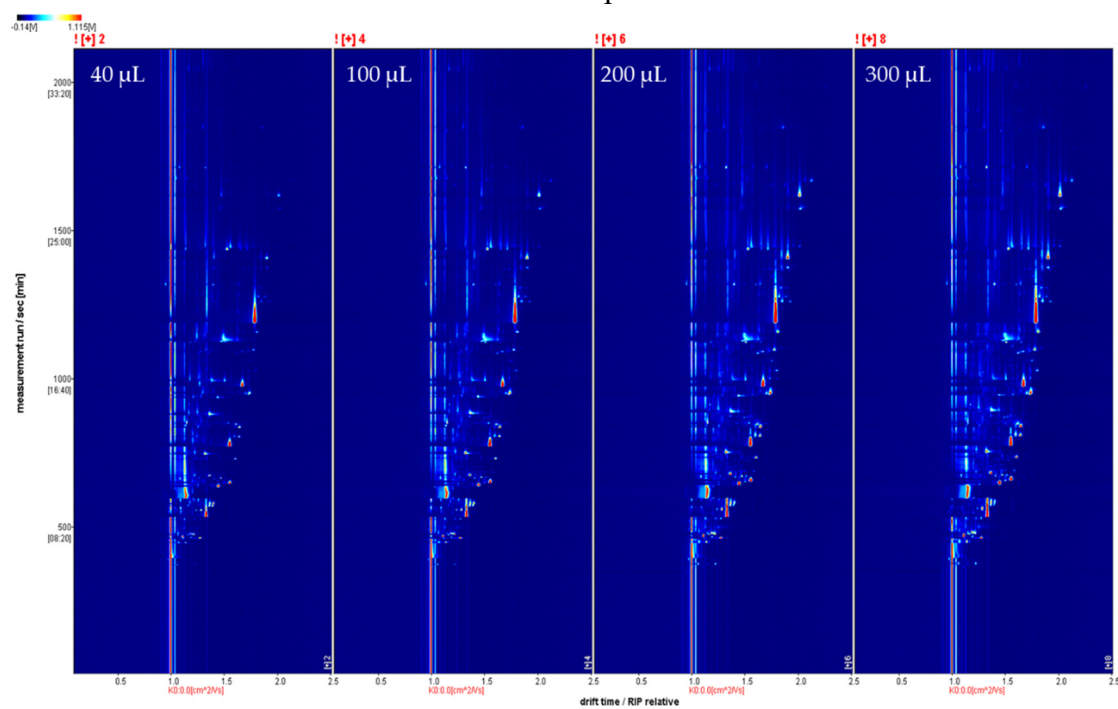

Figure S4. Topographic plot of Baijiu samples detected by GC-IMS with different injection volume.

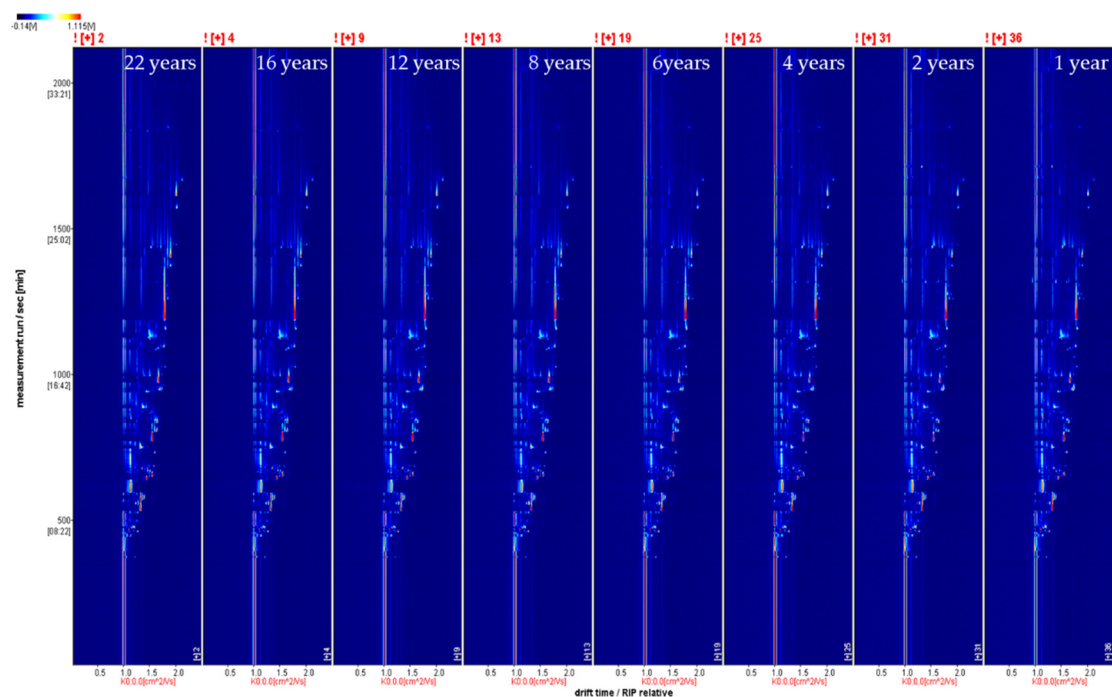

Figure S5. Topographic plot of Baijiu samples with different years detected by GC-IMS.

Table S1 Baijiu samples

| Codes | age (years) | Vintages | Alcohol content (%) |
|-------|-------------|----------|---------------------|
| A22-1 | 22          | 1998     | 61.5                |
| A22-2 | 22          | 1998     | 68.8                |
| A16-1 | 16          | 2004     | 61.2                |
| A16-2 | 16          | 2004     | 60.9                |
| A16-3 | 16          | 2004     | 61.1                |
| A16-4 | 16          | 2004     | 61                  |
| A16-5 | 16          | 2004     | 60.5                |
| A12-1 | 12          | 2008     | 65.7                |
| A12-2 | 12          | 2008     | 61.6                |
| A12-3 | 12          | 2008     | 64                  |
| A12-4 | 12          | 2008     | 63.2                |
| A8-1  | 8           | 2012     | 67.9                |
| A8-2  | 8           | 2012     | 67.5                |
| A8-3  | 8           | 2012     | 67.6                |
| A8-4  | 8           | 2012     | 68.7                |

|      |   |      |      |
|------|---|------|------|
| A8-5 | 8 | 2012 | 68.5 |
| A8-6 | 8 | 2012 | 68.8 |
| A6-1 | 6 | 2014 | 65.7 |
| A6-2 | 6 | 2014 | 67   |
| A6-3 | 6 | 2014 | 67.1 |
| A6-4 | 6 | 2014 | 67.1 |
| A6-5 | 6 | 2014 | 66.8 |
| A4-1 | 4 | 2016 | 64.6 |
| A4-2 | 4 | 2016 | 64.7 |
| A4-3 | 4 | 2016 | 65.1 |
| A4-4 | 4 | 2016 | 65.2 |
| A4-5 | 4 | 2016 | 65.3 |
| A4-6 | 4 | 2016 | 65   |
| A2-1 | 2 | 2018 | 68.5 |
| A2-2 | 2 | 2018 | 62.1 |
| A2-3 | 2 | 2018 | 69.2 |
| A2-4 | 2 | 2018 | 68.5 |
| A2-5 | 2 | 2018 | 66.9 |
| A1-1 | 1 | 2019 | 67.7 |
| A1-2 | 1 | 2019 | 68.2 |
| A1-3 | 1 | 2019 | 68.8 |
| A1-4 | 1 | 2019 | 68.9 |
| A1-5 | 1 | 2019 | 69   |
| A1-6 | 1 | 2019 | 69.2 |

Table S2 The information of standards

| Number | Compound              | Batch |
|--------|-----------------------|-------|
| 1      | 1,1-diethoxyethane    | 1     |
| 2      | hexanal               | 1     |
| 3      | 1-methylethyl acetate | 1     |
| 4      | ethyl hexanoate       | 1     |
| 5      | ethyl lactate         | 1     |
| 6      | 1-octanol             | 1     |

|    |                                    |   |
|----|------------------------------------|---|
| 7  | heptan-1-ol                        | 1 |
| 8  | 2-methylbutanal                    | 2 |
| 9  | 3-methylbutanal                    | 2 |
| 10 | butan-2-one                        | 2 |
| 11 | propan-2-one                       | 2 |
| 12 | propionaldehyde                    | 2 |
| 13 | 3-methylbutyl hexanoate            | 2 |
| 14 | ethyl 3-methylbutanoate            | 2 |
| 15 | ethyl 4-methylpentanoate           | 2 |
| 16 | propyl hexanoate                   | 2 |
| 17 | 2-methyl-1-propanol                | 2 |
| 18 | butan-2-ol                         | 2 |
| 19 | terpinen-4-ol                      | 2 |
| 20 | benzaldehyde                       | 3 |
| 21 | octanal                            | 3 |
| 22 | 2-methyl butanoic acid ethyl ester | 3 |
| 23 | ethyl heptanoate                   | 3 |
| 24 | methyl 2-methylbutanoate           | 3 |
| 25 | pentyl acetate                     | 3 |
| 26 | 1-hexanol                          | 3 |
| 27 | 1-butanol                          | 3 |
| 28 | linalool                           | 3 |
| 29 | acetic acid                        | 3 |
| 30 | 2-pentanone                        | 4 |
| 31 | methylpropanal                     | 4 |
| 32 | nonanal                            | 4 |
| 33 | 3-methylbutyl butanoate            | 4 |
| 34 | ethyl isobutyrate                  | 4 |
| 35 | isoamyl acetate                    | 4 |
| 36 | isobutyl acetate                   | 4 |
| 37 | methyl hexanoate                   | 4 |
| 38 | 3-methyl-1-butanol                 | 4 |
| 39 | pentan-2-ol                        | 4 |
| 40 | (E)-2-hexenal                      | 5 |

---

|    |                            |   |
|----|----------------------------|---|
| 41 | (E, Z)-2,6-nonadienal      | 5 |
| 42 | 2-heptanone                | 5 |
| 43 | butyraldehyde              | 5 |
| 44 | furfural                   | 5 |
| 45 | butyl acetate              | 5 |
| 46 | ethyl acetate              | 5 |
| 47 | ethyl butyrate             | 5 |
| 48 | ethyl pentanoate           | 5 |
| 49 | octanoic acid ethyl ester  | 5 |
| 50 | pentyl butanoate           | 5 |
| 51 | propanoic acid ethyl ester | 5 |

---

1 Table S3 The age discrimination of the prediction set samples

| Sample | Ture/year | Model A   |           | Model B   |           |
|--------|-----------|-----------|-----------|-----------|-----------|
|        |           | Predicted | Deviation | Predicted | Deviation |
| A2-4   | 2         | 1.4184    | -0.5816   | 1.8623    | -0.1377   |
| A6-3   | 6         | 5.5904    | -0.4096   | 5.9103    | -0.0897   |
| A8-3   | 8         | 7.6764    | -0.3236   | 7.9343    | -0.0657   |
| A16-3  | 16        | 16.0204   | 0.0204    | 16.0303   | 0.0303    |
